# Supplementary material for: The F-actin modulator SWAP-70 controls podosome patterning in osteoclasts
Source: PubMed Central journal article supplement — Bone Rep. 2016 Jul 19;5:214–21. doi: 10.1016/j.bonr.2016.07.002 (PMC5440945; doi:10.1016/j.bonr.2016.07.002), 2016-07-19
Supplement: mmc1.pdf [file mmc1.pdf]

## Supplemental Material

### Statistical analysis of vacuolar H<sup>+</sup>-ATPase positive / TRAP positive osteoclasts

A 800µm x 800µm region of interest (ROI) located directly below the growth plate of the femoral metaphysis was employed for assessment of the static parameter. Images of the ROI stained for TRAP or H<sup>+</sup>-ATPase from *Swap-70*<sup>-/-</sup> and control specimens (n=3 each group) were used for determination of TRAP-reactive osteoclast number and H<sup>+</sup>-ATPase-reactive osteoclast number. TRAP-reactive osteoclasts and H<sup>+</sup>-ATPase-reactive osteoclast within the ROI were counted and described in absolute numbers. All values are represented as mean ± standard deviation. Differences among the groups were assessed by the Student's t-test, and considered statistically significant at  $p < 0.05$ .

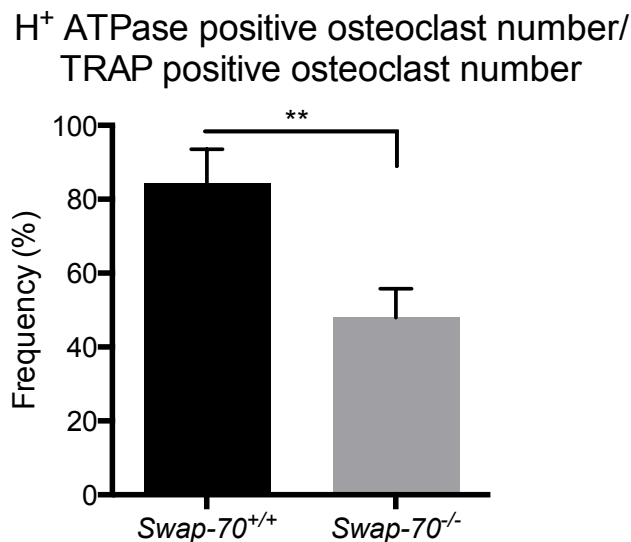

Supplemental Figure 1. Frequency of *Swap-70*<sup>+/+</sup> (black) and *Swap-70*<sup>-/-</sup> (grey) H<sup>+</sup>-ATPase positive / TRAP positive osteoclasts in decalcified femoral sections (n=3 individuals per genotype).
